# Supplementary material for: Supramolecular Tools to Improve Wound Healing and Antioxidant Properties of Abietic Acid: Biocompatible Microemulsions and Emulgels
Source: MDPI journal article supplement (doi:10.3390/molecules27196447), 2022-09-30
Supplement: s1 [file s1]

# Supramolecular Tools to Improve Wound Healing and Antioxidant Properties of Abietic Acid: Biocompatible Microemulsions and Emulgels

Alla Mirgorodskaya <sup>1</sup>, Rushana Kushnazarova <sup>1,\*</sup>, Rais Pavlov <sup>1</sup>, Farida Valeeva <sup>1</sup>, Oxana Lenina <sup>1</sup>, Ksenia Bushmeleva <sup>1</sup>, Dmitry Kuryashov <sup>2</sup>, Alexandra Vyshtakalyuk <sup>1</sup>, Gulnara Gaynanova <sup>1</sup>, Konstantin Petrov <sup>1</sup> and Lucia Zakharova <sup>1</sup>

<sup>1</sup> Arbuzov Institute of Organic and Physical Chemistry, FRC Kazan Scientific Center of RAS, Arbuzov str. 8, 420088 Kazan, Russia

<sup>2</sup> Kazan National Research Technological University, Karl Marx str. 68, 420015 Kazan, Russia

\* Correspondence: ruwana1994@mail.ru; Tel.: +7-843-273-22-93

Result quality : **Good**

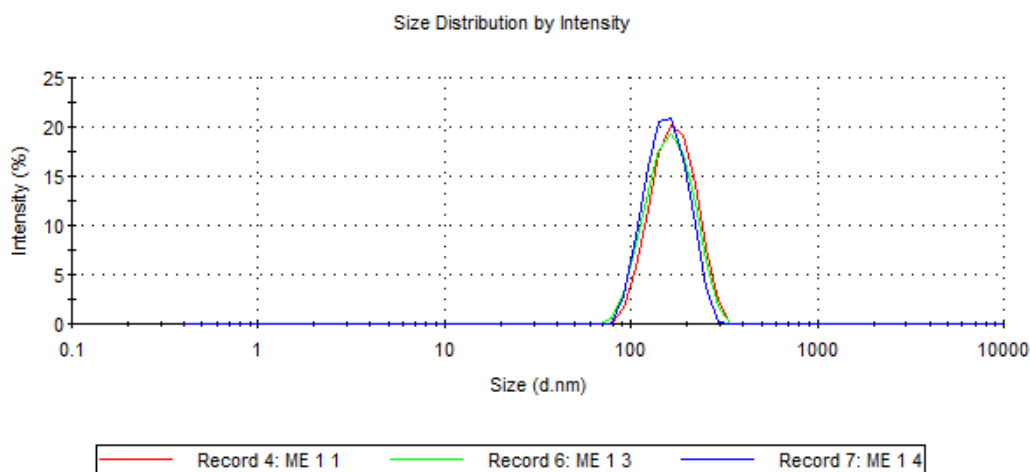

Figure S1. The DLS data: droplet size distributions in the ME 1.

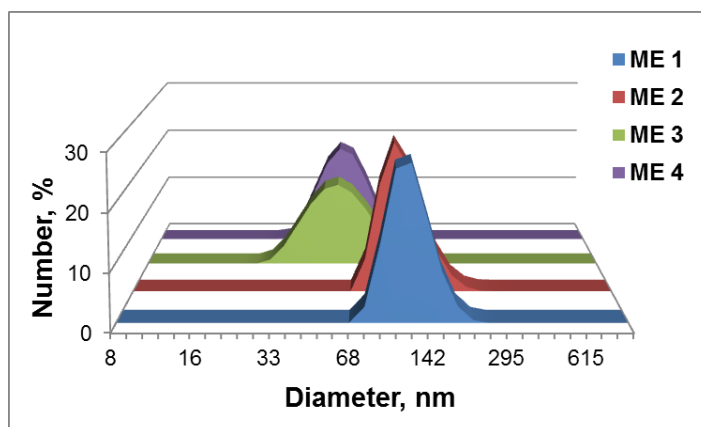

Figure S2. Droplet size distribution in different microemulsions.

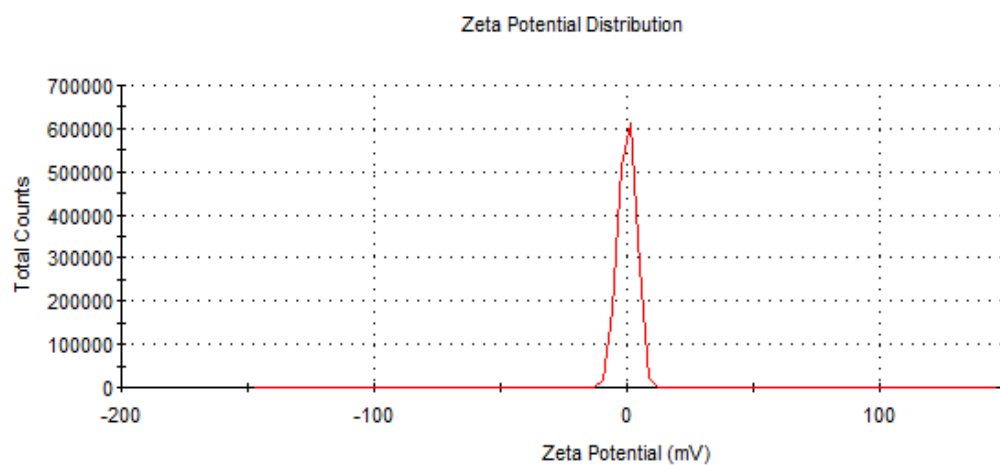

**Figure S3.** Zeta-potential of the ME 1 without a cationic surfactant.

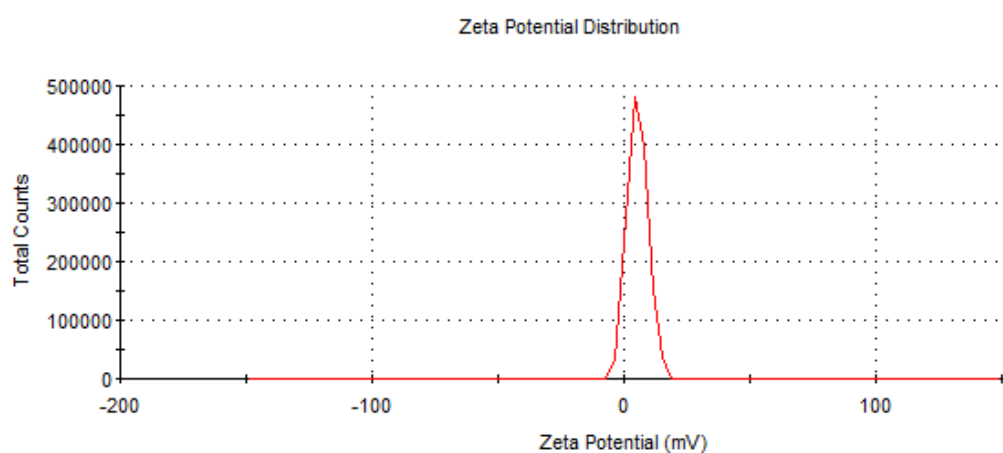

**Figure S4.** Zeta-potential of the ME 3 with the surfactant CB-16(Bu) (3% wt).

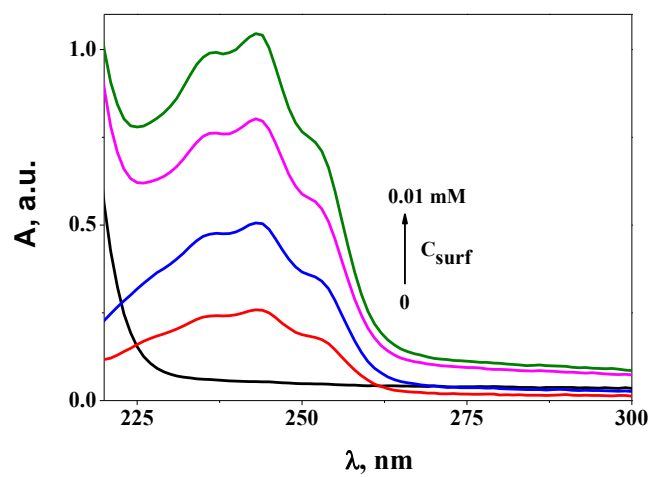

**Figure S5.** Spectra of saturated solutions of abietic acid recorded at various contents of surfactant CB-16(Bu).

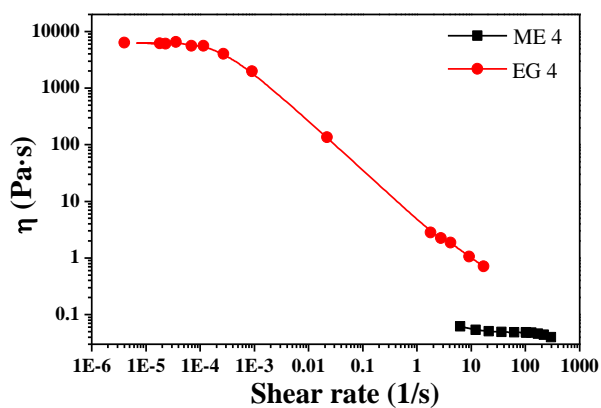

**Figure S6.** Apparent viscosity data for microemulsion (ME 4) and emulgel (EG 4), 25 °C.

**Table S1.** Position of the maximum and value of molar attenuation coefficient of abietic acid in various media.

| Media              | $\epsilon$ , l·mol <sup>-1</sup> ·cm <sup>-1</sup> | $\lambda_{\text{max}}$ , nm |
|--------------------|----------------------------------------------------|-----------------------------|
| Water              | 12,700                                             | 245                         |
| Ethanol            | 13,000                                             | 241                         |
| Tween 80           | 12,400                                             | 242                         |
| CB-16(Bu)          | 12,850                                             | 242                         |
| CTAB               | 13,100                                             | 242                         |
| PBS: Ethanol (1:1) | 13,000                                             | 240                         |
